# Supplementary material for: Reconciling the differences between OMI-based and EPA AQS in situ NO 2 trends
Source: Copernicus journal article supplement (doi:10.5194/amt-2017-410), 2018-01-25
Supplement: Supplementary file 1 [file amt-2017-410-supplement.pdf]

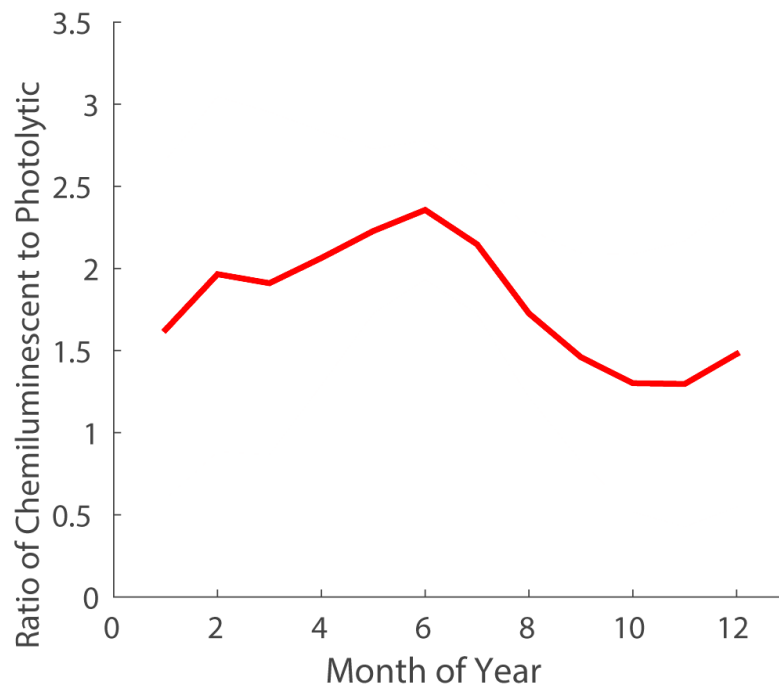

**Figure S1. The ratios between surface NO<sub>2</sub> concentrations of chemiluminescence to photolytic instruments. The ratios are calculated for each month from 7 sites with coincident photolytic measurements.**

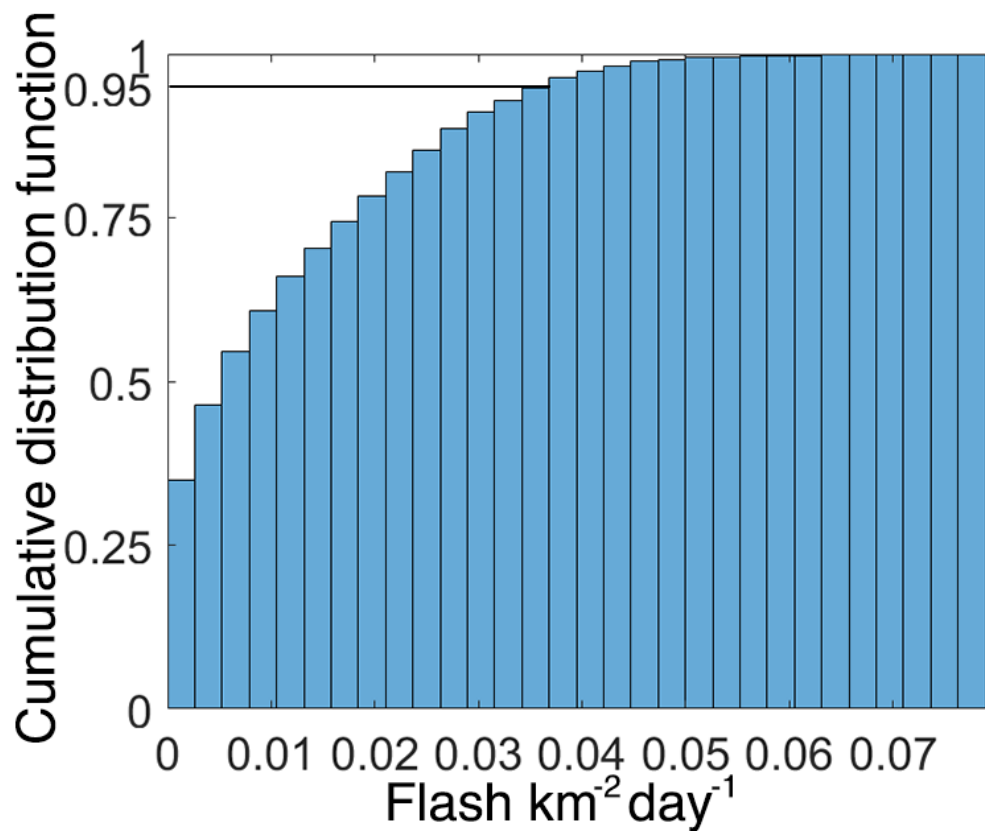

Figure S2. The cumulative distribution function of NLDN detected CG lightning density in the South.
